1 **Management performance mapping: the value of information for**  
2 **regional prioritization of project interventions**

3  
4

5 C. E. Buddenhagen<sup>123</sup>, J. Andrade Piedra<sup>4</sup>, G. A. Forbes<sup>4</sup>, P. Kromann<sup>4</sup>, I. Navarrete<sup>4</sup>, S.  
6 Thomas-Sharma<sup>5</sup>, Y. Xing<sup>123</sup>, K. A. Garrett<sup>123</sup>

7  
8  
9

<sup>1</sup>Plant Pathology Department, University of Florida, Gainesville, FL, USA

10 <sup>2</sup>Institute for Sustainable Food Systems, University of Florida, Gainesville, FL, USA

11

12 <sup>3</sup>Emerging Pathogens Institute, University of Florida, Gainesville, FL, USA

13

14 <sup>4</sup>International Potato Center, Lima, Peru, and Quito, Ecuador

15

16 <sup>5</sup>Plant Pathology Department, Louisiana State University, LA, USA

17

18

19 karengarrett@ufl.edu

20

21  
22  
23  
24  
25  
26  
27  
28  
29  
30  
31  
32  
33  
34  
35  
36  
37  
38  
39  
40  
41  
42  
43  
44  
45  
46  
47  
48

## ABSTRACT

Identifying the locations and settings where technologies are most likely to have important effects can make the most of development or extension efforts. In the context of development and applied ecology, decisions must often be made by policy makers and donors about where to implement projects designed to improve management. Implementation in some regions may provide substantially higher payoffs to investment, and higher quality information may help to target the high-payoff locations. The value of information (VOI) in this context is formalized by comparing the benefits from decision making guided by a set of information and the results of acting without taking the information into account. We present a framework for management performance mapping and for evaluating the value of information for decision making about geographic priorities in regional intervention strategies. In our case studies of Andean and Kenyan potato seed systems, we evaluate seed health and yield information from farms, plots, and individual plant observations. We use Bayesian networks and recursive partitioning to efficiently characterize the relationship between these performance measures and the environmental and management predictors used in studies aimed at understanding seed degeneration. These analyses return the expected performance of an intervention for predictor variables mapped across the landscape. We link the scientific process and the learning cycle to the value of information assessments to support a culture of continuous improvement that informs strategic agricultural development. Assessment of the value of information demonstrates the value of science as an integral part of targeted development programs.

*Additional keywords:* agricultural development, disease, Ecuador, GIS, intervention ecology, Kenya, pest management, potato, seed degeneration, translational science, value of information, virus, yield gap

49 A central problem in applied spatial ecology is how to partition management efforts across  
50 landscapes. Across larger spatial extents, interventions (e.g., by development organizations or  
51 governments) may be designed to increase yield across a region by improving management of  
52 agroecosystems. International governmental and non-governmental organizations that seek to  
53 reduce poverty, enhance food security, and improve natural resources and ecosystem services,  
54 need to understand how to prioritize regional interventions. We propose “management  
55 performance mapping” as a tool for translating experimental results to support decision making  
56 by policy makers and donors, and assessing the value of information (VOI) to support the  
57 analysis. Assessing the VOI involves determining the expected benefit of reducing or eliminating  
58 uncertainty (Canessa et al. 2015), as described below. In the absence of uncertainty, when the  
59 true state of the system is known, optimal actions can more readily be identified. Often data  
60 about agricultural management performance exist, or can be collected inside of existing  
61 intervention projects, but the data are collected at the scale of fields, farms or individual plant  
62 performance measures. Multiple factors influence plant productivity apart from management,  
63 creating uncertainty about the pay-off even where data are relatively abundant. Scaling up  
64 models based on limited observations is necessary to visualize how specific interventions are  
65 likely to perform at a regional scale (Altieri and Nicholls 2008; van Bussel et al. 2015a; van Wart  
66 et al. 2013; Grassini et al. 2015). Management performance mapping can be implemented to  
67 visualize the impact of proposed interventions, to improve decision-making and policy setting, in  
68 the development of innovations, and during project implementation – as a component of adaptive  
69 management in development (Fig. 1).

70 Data available for identifying good geographic prioritization strategies are generally limited,  
71 but evidence-based decision making can be designed to make the most of available data. VOI  
72 analyses offer a means of both valuing information and assessing the role of uncertainty in  
73 making good decisions (Hirshleifer and Riley 1979; Macauley 2006; Canessa et al. 2015). VOI  
74 analyses indicate the value of outcomes for decision making with and without particular  
75 information. The VOI should ideally be considered in the context of the mean outcome,  
76 associated uncertainty, and what is at stake with respect to making good or bad decisions (e.g.,  
77 the yield difference measured in yield or money) and how much stakeholders are willing to pay  
78 to act on their choices. The utility functions in studies of willingness to pay are related to VOI  
79 (Breider, Hahsler, and Reutterer 2006; Asante Bright Owusu et al. 2011; Hanemann 1991).  
80 Many examples in the VOI literature focus on agriculture, such as the uncertainty risk  
81 distribution for farm yield (Hirshleifer and Riley 1979), the value of weather forecasting for  
82 farmers (Lave 1963), and risk assessment for crop futures (Danthine 1978). A related area of  
83 application of VOI concepts is in invasion biology more generally and in conservation biology,  
84 where decisions must also be made about where to prioritize efforts (Canessa et al. 2015;  
85 Johnson et al. 2017; Wilson 2015). Of course, decision-maker willingness to act based on  
86 information is an important prerequisite for information valuation to be meaningful. For  
87 example, overly confident decision makers may not be influenced by new information, or they  
88 may not reflect on the uncertainty that is inherent in the information available. To our  
89 knowledge, VOI analyses have not been applied to plant pathology, crop epidemiology, or to  
90 seed system development, where they have the potential to improve decision making.

91 Precision agriculture and species distribution models both address components of spatial  
92 prioritization, at different scales. The question of how to optimize information use for decision  
93 making is addressed at the within-field scale in precision agriculture (Tittonell and Giller 2013),  
94 allowing well-resourced farmers to collect and utilize spatially explicit data sets (in near real

95 time) about crop performance (Devaux et al. 2010). Farmers are able to choose and optimally  
96 apply inputs such as fertilizer, pesticides, and irrigation to areas of the field where they are most  
97 needed to maximize yields. Species distribution models address the problem of optimal targeting  
98 indirectly, by providing information about where invasive (or endangered) species including  
99 pathogens are most likely to be found. They generally are designed to draw inference beyond  
100 regions where data were collected by assessing species niche parameters based on occurrences  
101 throughout a species' native and introduced range (Hijmans and Graham 2006; Condori et al.  
102 2014; Sparks et al. 2014; Aguirre-Gutiérrez et al. 2017; Austin 2007; Sutherst 1985).  
103 Management performance mapping can draw on pathogen species distribution models as one of  
104 the components determining how important disease management is likely to be, and how likely it  
105 is to be successful.

106 We present a case study that focuses on smallholder management of seed degeneration in  
107 agricultural systems. "Seed degeneration" is the reduction in yield or quality caused by an  
108 accumulation of pathogens (especially viruses) and pests in planting material over successive  
109 cycles of propagation, where vegetatively propagated crops deserve particular attention because  
110 of their higher risk of disease transmission (Sharma and Kang 2003; Thomas-Sharma et al. 2016;  
111 Thomas-Sharma et al. 2017; Iritani 1968; Kawakami 1962). Establishing improved seed systems  
112 is challenging, especially in low-income countries, due in part to the many system components  
113 that must be integrated for seed system success (Jaffee and Srivastava 1994; McGuire and  
114 Sperling 2016; McQuaid et al. 2016; Sperling 2008; Gildemacher et al. 2009; Bentley and  
115 Vasques 1998). Seed system improvement has been a major focus of agricultural development  
116 efforts funded by many agencies (e.g., national plant protection agencies, The Bill and Melinda  
117 Gates Foundation, USAID, and FAO), but has often proven to be challenging to implement  
118 (Jaffee and Srivastava 1994; Almekinders C. J. M., Louwaars N. P., and De Bruijn G. H. 1994;  
119 McGuire and Sperling 2016). In informal seed systems in low-income countries farmers  
120 typically use seed saved from the previous season for replanting, often leading to reduced yields,  
121 e.g., 5-50% reduction (Devaux et al. 2010), especially when farmers are unfamiliar with  
122 approaches for selecting seed with reduced pathogen risk.

123 Optimizing yield by reducing disease impacts, and improving seed quality, is a primary goal  
124 of many seed system interventions. Governments and institutions with a strong focus on science  
125 for development, such as CGIAR, work on a suite of factors linked to seed system health. Farmer  
126 training efforts focus on options for disease management and optimal decision-making.  
127 International development efforts to improve seed systems seek to increase farmer access to  
128 disease-free, disease-resistant, high-quality seed, and improve farmer practices to implement  
129 "integrated seed health strategies" (Thomas-Sharma et al. 2017; Thomas-Sharma et al. 2016).  
130 Attempts to formalize seed systems by imposing seed quality standards may fail if thresholds are  
131 unrealistic (Choudhury et al. 2017) and despite many interventions systems may revert to largely  
132 informal systems, with sub-optimal seed sourced from on farm much of the time, e.g., 98% of  
133 potato seed sources in the Andes are informal (Louwaars, de Boef, and Edeme 2013; Devaux et  
134 al. 2010). Interventions are more likely to succeed if they are affordable, and help farmers to be  
135 profitable (McGuire and Sperling 2013; Sperling, Ortiz, and Thiele 2013). As an example,  
136 positive selection is an on-farm management intervention that can provide large yield benefits,  
137 e.g. 28-55% increases (mean 32%) (Gildemacher et al. 2012, 2011). Positive selection is often  
138 recommended as part of an integrated seed health strategy. Under positive selection, farmers  
139 select healthy appearing plants and mark them for later harvesting of seed potato tubers.

140 Training farmers in the techniques of positive selection is an attractive potential intervention to  
141 support integrated seed health strategies.

142 A risk framework for an integrated seed health strategy (Thomas-Sharma et al. 2017)  
143 examines the factors influencing seed system success (e.g., on farm seed management, disease-  
144 free seed sources, amount of inoculum) and provides a useful starting point for the type of  
145 interventions that could be included in a management performance mapping analysis for seed  
146 systems. Management performance maps for seed systems should use reference data sets that  
147 focus on these key factors. In practice, the best available data sets, collected via literature  
148 reviews, experiments or on-farm observational studies, will fall short of an ideal data set. As  
149 such, scientists, policy-makers and funders interested in evidence-based decision-making often  
150 must make decisions based on the available data, even if data are sub-optimal. Management  
151 performance mapping can provide a useful starting point for assessing the most effective  
152 interventions for large scale (large extent, low resolution) interventions. We envisage that  
153 management performance maps could be useful for assessing the likely relative value of  
154 management interventions across regions, and as a means of reporting on the effectiveness of  
155 interventions. Management performance maps can be used to target limited resources to places in  
156 the landscape where impacts are likely to be highest.

157 Our objectives in this study are to (i) introduce and illustrate the concept of management  
158 performance mapping and associated methods, (ii) introduce the use of VOI analysis in this  
159 context, (iii) compare methods for identifying predictor variables for management outcomes, and  
160 (iv) illustrate the application of management performance mapping to potato seed degeneration  
161 data from the Ecuadorian Andes and Kenya.

## 162 163 **MATERIALS AND METHODS**

164  
165 A primary decision for agricultural development is where to invest limited resources for an  
166 intervention. For the case of seed systems, potential interventions include training, seed  
167 multiplier subsidies, and improved variety dissemination. We start by describing the steps  
168 involved in producing management performance maps, using the example of training in positive  
169 selection by farmers to identify plants more likely to produce healthy seed (Fig. 2). Then we  
170 illustrate management performance mapping using a detailed seed degeneration data set from a  
171 potato seed study in Ecuador. As a step in preparing the management performance maps, we  
172 illustrate the application of Bayesian networks and recursive partitioning for assessing the  
173 influence of disease, environmental factors, and management on yield, and similarly assess  
174 factors that influence virus incidence. We also evaluate the potential value of the information for  
175 guiding selection of locations in development interventions, if the estimated mean performance  
176 is correct, for potato seed health in Ecuador and Kenya.

177  
178 **Management performance maps: steps.** Linking real world farm or field level management  
179 data to mapped landscape level data involves the following steps (Fig. 2): (i) gather management  
180 performance data, (ii) identify performance measures and predictor variables, (iii) evaluate  
181 management performance for the proposed interventions, (iv) identify the best management  
182 intervention or policy based on currently available data, (v) assess the value of information,  
183 (vi) link predictor variables to GIS data layers, (vii) implement interventions, (viii) facilitate and  
184 assess technology adoption by farmers. We illustrate steps i through v, while steps vi and vii  
185 would be key to achieving outcomes in the field.

186

## 187 **Gathering management performance data**

188

189 To illustrate the process, we use two data sets, the first being data related to potato production in  
190 Ecuador, the elements of which are designed to support parameter estimation for a seed  
191 degeneration model (Thomas-Sharma et al. 2017). The main components of this model relate to  
192 seed health (virus incidence, seed age since certified seed was produced), variety, environmental  
193 factors (weather), management (seed propagation and selection) and yield data (Kromann et al.  
194 2017). A single field represented each of the scenarios (treatment combinations) in this data set,  
195 so variability within a scenario can only be evaluated at the individual plant level. We focus on  
196 yield data as the response as an example, and the intervention of positive selection versus  
197 roguing and random seed management strategies. Second, we used published data about seed  
198 health management, and positive selection training and adoption rates in Kenya to explore how  
199 information about the likelihood that farmers in a region will adopt a technology can be  
200 integrated (Gildemacher et al. 2012).

201

## 202 **Identifying performance measures and predictor variables**

203

204 A variety of methods are useful for selecting predictor variables for performance indicators. We  
205 focus on two types of machine learning algorithms: Bayesian networks and recursive partitioning  
206 trees (Therneau, Atkinson, and Ripley 2010). These were selected because of their under-  
207 appreciated utility in applications such as disease or pest management, and their utility for our  
208 problem. As performance indicators, we focused on yield.

209 Classification and regression trees have been applied in agricultural systems for the  
210 purposes of land and soil classification, climate change impact assessment, risk assessment, toxin  
211 levels and disease conduciveness for plants (Langemeier et al. 2016; Novak and LaDue 1999;  
212 Etter et al. 2006; Caley and Kuhnert 2006; Paul and Munkvold 2004; Tittonell and Giller 2013).  
213 These models are known for their ability to identify important variables in classification  
214 problems, identify hierarchically the most important predictor variables, and to support decision  
215 making processes. Recursive partitioning is a type of decision tree model. The strength of the  
216 recursive partitioning method lies in its ability to deal with non-linearity in the data, and depict  
217 and interpret the outputs in decision-tree format. A limitation of this method is that it may  
218 perform relatively poorly with continuous variables or large numbers of unordered variables. In  
219 R there are several packages that perform recursive partitioning, where randomForest, caret,  
220 party and rpart are among the most used (Therneau, Atkinson, and Ripley 2010). We used rpart,  
221 designed to perform well even when missing data are common.

222 Bayesian networks have been applied in natural resource management systems for  
223 vegetation classification, optimal decision making, disease management and expert elicitation  
224 (Geenen and Van Der Gaag 2005; Aguilera et al. 2011; Kristensen and Rasmussen 1997; Perez-  
225 Ariza, Nicholson, and Flores 2012). A Bayesian network is a directed, acyclic graph whose  
226 nodes represent predictor variables, and links represent dependencies. The relationships between  
227 variables are quantified by conditional probability tables. All of these tables together represent  
228 the full joint distribution. These models are designed to incorporate learning from both empirical  
229 data and from expert assessment, to build conditional probability tables. Important strengths of  
230 the Bayesian network method lie in its ability to infer probabilistic relationships between many  
231 variables simultaneously. The network structure can be set manually by the user or learned from



232 the data using a variety of algorithms. In the case of exact estimation algorithms, it is possible to  
233 set values for any combination of nodes and produce new posterior probabilities for each  
234 variable in the network. A limitation of this method is the cost of some of the most advanced  
235 Bayesian network software. In addition, mixed data of continuous and categorical data can be  
236 problematic for commonly used Bayesian network algorithms. These algorithms tend to work  
237 best for cases where all the variables are continuous, or all are discretized. Tools available for  
238 Bayesian network analysis include BI-CAMML, Hugin and Netica (Aguilera et al. 2011). R  
239 packages include bnlearn, gRain and pcalg (Nagarajan, Scutari, and Lèbre 2013). We selected  
240 Netica for this illustration because it is relatively affordable, the algorithms it uses allow for  
241 immediate updating of conditional probabilities based on selected levels for variables, it has a  
242 powerful graphical interface, and it is widely used in ecological and environmental analyses  
243 (Aguilera et al. 2011).

244

### 245 **Evaluating management performance**

246

247 Training in positive selection methods is often useful for familiarizing farmers with disease  
248 symptoms and benefits (Gildemacher et al. 2012). We consider data (Kromann et al. 2017) from  
249 potato seed production in Ecuador, asking at what locations the benefits of training in positive  
250 selection are likely to be greatest. These data (Kromann et al. 2017) focus on potato yield and  
251 virus incidence for six viruses, under different management practices, such as positive selection  
252 and the number of plantings since disease-free seed was obtained. Using Bayesian network  
253 analysis, as described above, the estimated yield with and without positive selection was  
254 evaluated for each of three generations of seed at elevations above and below 2895 m a.s.l., the  
255 threshold elevation identified in the Bayesian network analysis. Thus, the decision about where  
256 to invest in positive selection training might be phrased in terms of (a) uninformed (random) site  
257 selection, where each location is equally likely to be selected for training, and (b) informed site  
258 selection, where locations above or below 2895 m a.s.l. may be targeted for training, depending  
259 on which provides greater benefits, and (c) misinformed site selection, selecting higher or lower  
260 elevations based on an incorrect belief about where positive selection will provide greater  
261 benefits. For example, there could be a prior belief that a particular pathogen will be more  
262 prevalent at lower elevations, due to a higher abundance of vectors, thus making positive  
263 selection more important there.

264

265 ***Yield evaluated in Bayesian networks*** - The benefit of positive selection (in the third year after  
266 disease-free seed purchase) was estimated using a Bayesian network in Netica. Netica's Tree-  
267 Augmented Naive Bayes (*TAN*) classifier algorithm was used to estimate the conditional  
268 probability tables and the network structure. From the conditional probability tables we obtained  
269 estimated yields above (7.7 t/ha) and below (3.2 t/ha) 2895 m.a.s.l.

270

271 ***Interacting factors evaluated with recursive partitioning.*** We can assess scenarios where we  
272 have information about interacting predictors, and these are or are not taken into account in the  
273 targeting of training. Here we use experimental data about yield under positive selection (as  
274 opposed to roguing or random seed selection), at different altitudes and for certified seed that has  
275 been propagated for three seasons or less than three seasons.

276

277 **Considering variety with recursive partitioning.** The two most important ware potato varieties  
278 in Ecuador, Superchola and Fripapa, were sold at a ratio of 2:1 by volume by growers in a  
279 cooperative in Tungurahau, Ecuador (Buddenhagen et al. 2017), and there was a similar ratio of  
280 farmers growing each type. For this illustration, let us ignore the other 14 varieties that were  
281 grown in this cooperative, as the volumes reported were less than 10%. Some farmers grow both  
282 varieties. We consider variety, altitude, and management by estimating mean per plant yields  
283 under different conditions, and by using recursive partitioning in rpart. The observed proportion  
284 of Ecuadorian farmers using certified seed was reported at 2% (Devaux et al. 2010), though for  
285 some organized groups the proportion can be as high as 46% (Buddenhagen et al. 2017). In  
286 summary, the reported ratios for this example are as follows: farm altitude (high to low, 51:49),  
287 potato variety (Fripapa to Superchola, 33:66) and potato seed age (old to new, 98:2).

288  
289 **Regional differences in adoption of training recommendations.** Another example of evaluating  
290 management performance, and where management performance is greatest, is based on regional  
291 differences in adoption of positive selection after training (Table 1). In one study, adoption  
292 varied for three Kenyan counties: Nakuru 46%, Nyadarua 19%, and Narok 18% (Gildemacher et  
293 al. 2012). The average benefit of positive selection was 3.4 tons per ha (~USD 350 per ha). This  
294 translated to a per-household benefit of \$156 per season for a farm of average size for the region.  
295 Meanwhile the cost of training was \$38 per farmer. In this case, the average value for each  
296 region combined gives the expected benefit of \$44 where training occurs in a random region.

## 297 298 **Applying models to a map of the relevant region**

299  
300 We selected for analysis and extrapolation a major potato growing region stretching from  
301 southern Ecuador to southern Colombia. Using data from mapSPAM (HarvestChoice 2014), we  
302 identified the region for evaluation by selecting pixels with >200 ha potato production per pixel  
303 (where a pixel represents 5-arc minutes, approximately 10,000 ha). Here 51% of potato  
304 production is above 2895 m based on MapSpam estimates (You et al. 2012), the elevation cut-off  
305 for predicting yield from the Bayesian network analysis.

306  
307 The data layer of management performance estimates is one important factor for deciding about  
308 where to prioritize management efforts. This analysis effectively treats each location as  
309 independent from other locations. However, some locations will have more important roles in  
310 epidemics than others, due to factors such as environmental conduciveness to disease and  
311 position in spatial epidemic networks. We evaluated the layer of management performance  
312 estimates for positive selection with a data layer of the potato cropland connectivity risk index, a  
313 measure of the likely importance of locations for spatial movement through potato growing areas  
314 (Xing et al. 2017).

## 315 316 **Estimating the value of information**

317  
318 We assess the value of information for decisions about where to invest management  
319 interventions. For the purposes of this study we consider cases where decision makers either  
320 have or do not have information about geographic differences in management performance. In  
321 the absence of information, they might select any location for management with equal  
322 probability. An estimate of the value of information in this case would be the difference in the



323 benefit of investment for locations selected based on the information (“informed location  
324 selection”), and the benefit for locations selected randomly (“uninformed location selection”). In  
325 the case where decision makers have a prior belief that is not supported by the data, or a  
326 misconception, the value of information would be the difference between investments based on  
327 the misconception (“misinformed location selection”), versus informed investments. We look at  
328 the uninformed and informed management choices related to spatially distributed differences in  
329 yield, disease, variety and rates with which best practices are adopted.

330  
331 We evaluated uncertainty through the lens of how frequently the better management choice  
332 would be made (in terms of managing seed degeneration over the three years) based on the data  
333 available, as follows. For each of the 28 potential pairwise comparison of management scenarios  
334 (each pair of treatment (positive selection versus random) x year (year 1 or 3) x altitude  
335 combinations), the difference in yield randomly drawn from the set of observed yields for the  
336 treatment combination was collected 10,000 times. (Note that yields were available at the  
337 individual plant level, rather than the individual farm level across multiple farms.)

## 338 339 **RESULTS**

### 340 341 **Identifying performance measures and predictor variables, and evaluating management** 342 **performance**

343  
344 *Positive selection and yield for Andean potato.* The Bayesian network analysis (Fig. 3) showed  
345 that, compared to low yield plants, high yielding plants were found in plots more commonly  
346 where first generation seed was used, at higher altitudes, with the Fripapa variety, and with lower  
347 minimum temperature and higher rainfall six months after planting, as well as low levels of  
348 PVX, PLRV, and PVY. The uncertainty is high compared to the observed values. In the  
349 recursive partitioning analysis (Fig. 4), higher per plant yields were generally obtained from  
350 Fripapa (compared to Superchola) in the first two years after certified seed was bought, the  
351 highest yields being obtained for altitudes over 3278 m. Meanwhile the highest yields for  
352 Superchola were found above 2895 m altitude. If a farmer can afford to replace seed more  
353 frequently, and the farm is over 3200 m, Fripapa might be a better choice than Superchola if only  
354 a single variety is grown, based solely on yield and assuming the value in the market is  
355 comparable (0.29 versus 0.33 cents per kg respectively).

356  
357 Year 3 plants yield ~300 g per plant less on average, and the benefits of positive selection allow  
358 yields to approach the average yields for recently purchased certified seed (if values from cycle 1  
359 and 2 are combined). Since there are no differences with respect to variety in year/cycle 3 after  
360 certified seed it would seem positive selection is equally valuable in both varieties for seed that  
361 has gone through more than a two planting cycles.

362  
363 The price farmers obtain for each variety was estimated to be \$0.33 USD per kg for Superchola  
364 and \$0.29 USD per kg for Fripapa (Navarrete, personal observation). The variety Superchola  
365 has entered into the common parlance and is widely regarded as superior, even though there is  
366 some evidence that consumers cannot easily recognize the difference between ware potato of it  
367 and other varieties (Kromann, personal observation).

368

369 **Positive selection and yield for Kenyan potato.** This analysis was based on the probability of  
370 adoption of positive selection, where higher adoption rates result in a higher payoff for  
371 investment. Adoption rates were 46, 19 and 18% in three regions (Table 1) (Gildemacher et al.  
372 2012, 2011). Thus, based on this measure alone, selection of the region with better training  
373 uptake would double the benefits obtained of a training intervention focused only in the other  
374 areas.

375

### 376 **Applying models to a map of the relevant region and integrating data layers**

377

378 The mapped estimates of the management performance of positive selection for Andean potato  
379 yield (Fig. 5A) and the locations where cropland connectivity risk was highest (Fig. 5B) could be  
380 combined to identify locations both independently likely to be successful and of importance for  
381 regional management.

382

383 **VOI for targeted implementation of positive selection (yield as response, Bayesian networks to**  
384 **identify predictors)** For equivalent farm sizes above and below 2895 m, we can estimate the  
385 benefit of training under uninformed (random) site selection by using the weighted mean of the  
386 benefit above and below 2895 m.a.s.l., which is 6.5 t/ha ( $0.51 * 7.7 + 0.49 * 3.2 = 6.5$ ).

387

388 The estimated benefit under informed site selection, selecting locations above 2895 m, is 7.7 t/ha  
389 – a difference of 1.2 t/ha from random site selection. Under misinformed site selection, if the  
390 assumption was that positive selection provides more benefits at low altitude due to greater  
391 pathogen load, then the benefit is 3.2 tons per ha, 4.5 tons per ha less than the optimal allocation,  
392 and 3.3 tons per ha less than the uninformed (random) site selection option.

393

394 **VOI for targeted implementation of positive selection (yield as response, rpart to identify**  
395 **predictors)** Assuming that positive training targeted farmers randomly with respect to the  
396 observed frequency of the variables, the weighted mean benefit of positive selection would be  
397 8.7 tons per ha. Preferentially targeting sites at high altitude (but sampling randomly with respect  
398 to seed age and variety) provides higher benefits of 9 tons per ha, otherwise targeting low  
399 altitude sites provides lower returns at 8.3 tons per ha. Targeting farmers who plant old seed (3  
400 years since certification) provides little benefit: 8.8 tons per ha compared to random targeting of  
401 farmers (under the scenario where use of certified seed is rare at 2%), but targeting the 2% that  
402 do use new seed provides a benefit of 3.1 tons per ha. By far the greatest benefit is provided by  
403 targeting farmers that grow Fripapa (benefit of 10.9 tons per ha) as opposed to Superchola  
404 (benefit of 7.6 tons per ha).

405

### 406 **Regional differences in adoption of training recommendations in Kenya.**

407 In the example of Kenyan potato seed technology adoption, targeted selection of high adoption  
408 rate areas for training (where the per-farmer benefit was \$72) would increase the return by \$28  
409 per farmer trained. Realized benefits would vary depending on farm sizes for the targeted  
410 farmers.

411

412

413

414

## 415 DISCUSSION

416

417 The value of information was assessed by comparing (a) allocating development resources (with  
418 the example of positive selection training for farmers) without regard to the observed site  
419 characteristics, and (b) targeted allocation of training resources toward sites with known  
420 characteristics. In our example, the data (and expert expectation) show that positive selection is  
421 often an effective way to reduce seed degeneration. An NGO or government extension agency  
422 could implement a rural development intervention where farmers are trained to use positive  
423 selection without regard to their specific farm conditions, variety used or the frequency with  
424 which they can buy improved seed. However we showed that this option is not optimal as a  
425 means of obtaining higher yield, and lower disease incidence. We compared uninformed and  
426 informed allocation of resources, to assess the value of the information used for targeting  
427 interventions. In the simplest scenario, using results from Bayesian networks, we showed that the  
428 benefit of positive selection was highest (4.5 tons per ha) at high altitudes, and uninformed  
429 allocation of farmer training would provide a net benefit of 1.2 tons per ha less than targeted  
430 training.

431 Using data about adoption rates from Kenya, we showed that unless adoption rates were  
432 higher than 24%, the first-year benefit per household would not exceed the \$38 per farmer cost  
433 of training (though presumably the benefits would continue to accrue in subsequent years). Also  
434 random allocation of training effort would only yield a \$44 dollar benefit (over the cost of the  
435 training) per household. Gildemacher et al. (2017) also point out that adoption rates were lower  
436 in drought years, suggesting that prediction of adoption rates could be difficult if based on  
437 regional patterns in a single year. It is easy to imagine scenarios where observed adoption rates  
438 (say in a training scheme) would vary in predictable ways based on in season weather conditions,  
439 language spoken, literacy, cultural differences between trainer and trainee, wealth or other  
440 factors. Further spatial data could be available for key predictor variables, and could form a part  
441 of selection criteria for farmer training initiatives (and the approach to the training could be  
442 altered to improve adoption rates).

443 Then in a more complex scenario, we showed that targeting farmers growing the variety  
444 Fripapa, or at high altitude was the optimal strategy. Not examined was the size of the farms,  
445 which would logically determine the returns on training efforts per farmer. Over and above the  
446 availability of data, the value of information in this scenario requires that the data be linked to  
447 real world distributions of farm or farmer characteristics and behavior (we used altitude, variety  
448 use, rate of seed replacement).

449 We showed that recursive partitioning and Bayesian networks provide easily interpreted  
450 graphics and estimates of the predictor variables related to yield in seed degeneration studies. We  
451 anticipate that these tools will be useful in other studies examining disease incidence or yield and  
452 predictor variables related to management or environmental conditions.

453 Combining data layers for evaluating optimal intervention strategies can provide more  
454 insight, along with challenges due to uncertainty. Evaluating the risk of disease due to cropland  
455 connectivity (Xing et al. 2017) in combination with independent location traits can position the  
456 analysis in the larger context of disease management for the region. A broader systems analysis  
457 – for example, impact network analysis (Garrett 2018; Garrett et al. 2018), which integrates  
458 across management performance, socioeconomic networks, and biophysical networks such as  
459 epidemic networks – can aid in identifying intervention locations that prioritize across multiple  
460 goals.

461 Management performance mapping is potentially applicable to any problem in  
462 intervention agriculture or ecology with measurable outcomes. Yield gap analyses that  
463 incorporate maps can address some of the same goals as management performance mapping  
464 (Schulthess et al. 2013; Silva et al. 2017; Lobell, Cassman, and Field 2009; Lobell et al. 2015;  
465 van Ittersum et al. 2016; Grassini et al. 2015; van Bussel et al. 2015b). For example, yield gap  
466 analysis attempts to identify the most important factors that influence yield, and are controllable.  
467 The focus of management performance mapping, however, is on providing spatial information  
468 about intervention impact of management options. Management performance maps would  
469 ideally incorporate and account for interacting human dimensions (e.g., learning, financial  
470 liquidity, capital, institutions) and biophysical aspects of crop production (Arneth et al., 2014)

471 To make maps, management performance measures are modelled as a function of  
472 predictor variables available in geographic data layers, e.g., climate variables, altitude, or soil  
473 fertility. Useful outcome variables include yield, disease incidence, measures of crop quality,  
474 technology adoption levels, or measures of food security. As in species distribution modeling,  
475 data to inform management performance mapping may come from experiments, surveys or  
476 monitoring of management carried out at any scale. Species distribution models for crops can,  
477 themselves, be a useful predictor variable for evaluating the importance of management of  
478 invasive species. Worldwide crop distribution models are valuable for defining the relevant  
479 locations for consideration of management options (You et al. 2014; Monfreda, Ramankutty, and  
480 Foley 2008). Alternatively, there could be cases where maps are derived from crop distributions  
481 are well understood via more direct means such as remote sensing, surveys or farm level  
482 measurements (e.g., Lobell et al. 2015). The extent and depth of the reference data, the  
483 magnitude of management effect sizes, and the degree to which geographic extrapolation is  
484 appropriate will determine the level of confidence decision makers have in management  
485 performance maps.

486 Our example decision, deciding where to implement training for improved disease  
487 management, represents a class of decisions where there is confidence that the activity will  
488 provide a benefit. Management performance mapping is applied to guide implementation to  
489 locations where there is some evidence that the benefit will be greater than in other locations.  
490 For this class of decisions, the risk is low that limited data is “worse than no data at all”. In the  
491 language of hypothesis testing, there is not a strong motivation to avoid Type I error (rejecting a  
492 null hypothesis when the null hypothesis is true), because a Type II error (failing to reject a null  
493 hypothesis when the null hypothesis is false) is arguably just as bad. In the management  
494 performance mapping context, the null hypothesis is that the benefit of implementation will be  
495 the same in all locations. The main risk of “bad data” would be from data with a strong bias that  
496 would lead to misinformed decisions. The cost of “bad data” may also go up if the logistical  
497 costs (of transport, communications, etc.) of targeting locations incorrectly identified  
498 is higher than targeting locations at random or selecting locations based on convenience.

499 We addressed management performance mapping with performance defined in terms of  
500 the mean performance observed. Other potential criteria for selecting regions for investment  
501 might emphasize different priorities (Table 2). Going forward with applying management  
502 performance mapping, it will be important to consider not only the value of information under a  
503 reasonable set of assumptions, but also the role of uncertainty. One of the applications of VOI  
504 analysis is to determine whether collecting more or better data about management performance is  
505 justified, not just for the sake of more statistical power but because the information improves  
506 farmer decision-making under a realistic range of conditions. Scientists, funders and policy

507 makers will need to evaluate whether decreasing uncertainty is likely to lead to shifts in the mean  
508 of the performance measures. There may be little value in collecting more evidence about  
509 management performance if the mean is little influenced. Estimates of uncertainty were obtained  
510 from the Bayesian and recursive partitioning methods we used, but we emphasized the  
511 differences in the estimated value of the management rather than the spread of the uncertainty.  
512 In our example data, our only estimate of uncertainty within a scenario was based on variability  
513 among individual plants, while a person making decisions about regional priorities would  
514 strongly prefer to have information about farm-to-farm variability within each scenario.  
515 However, emphasizing mean differences in management outcomes could be justified, in general,  
516 even if uncertainty is high, particularly if there is reason to believe more data will not lead to  
517 major shifts in the ranking of mean management performance. Management performance  
518 mapping provides a process to extrapolate from available data to make evidence-based decisions  
519 about where to invest in disease and crop management or training initiatives.

## 520 **ACKNOWLEDGMENTS**

521 We appreciate support by the CGIAR Research Program for Roots, Tubers and Bananas, the  
522 CGIAR Research Program on Climate Change and Food Security (CCAFS), USDA NIFA grant  
523 2015-51181-24257, the USAID Feed the Future Haiti Appui à la Recherche et au  
524 Développement Agricole (AREA) project, The Ceres Trust, NCR SARE Research and Education  
525 Grant LNC13-355, USDA APHIS grant 11-8453-1483-CA, US NSF Grant EF-0525712 as part  
526 of the joint NSF-NIH Ecology of Infectious Disease program, US NSF Grant DEB-0516046, and  
527 the University of Florida.

528  
529

## 530 **LITERATURE CITED**

531

- 532 1. Aguilera, P. A., Fernández, A., Fernández, R., Rumí, R., and Salmerón, A. 2011. Bayesian  
533 networks in environmental modelling. *Environmental Modelling & Software*. 26:1376–1388.
- 534 2. Aguirre-Gutiérrez, J., van Treuren, R., Hoekstra, R., and van Hintum, T. J. L. 2017. Crop  
535 wild relatives range shifts and conservation in Europe under climate change. *Diversity and*  
536 *Distributions*. 23:739–750.
- 537 3. Almekinders C. J. M., Louwaars N. P., and De Bruijn G. H. 1994. Local seed systems and  
538 their importance for an improved seed supply in developing countries. *Euphytica*. 78:207–  
539 216.
- 540 4. Altieri, M. A., and Nicholls, C. I. 2008. Scaling up Agroecological Approaches for Food  
541 Sovereignty in Latin America. *Development*. 51:472–480.
- 542 5. Arneth, A., Brown, C., and Rounsevell, M. D. A. 2014. Global models of human decision-  
543 making for land-based mitigation and adaptation assessment. *Nature Climate Change*. 4:550–  
544 557.
- 545 6. Asante Bright Owusu, Otoo Emmanuel, Wiredu Alexander Nana, Acheampong Patricia,  
546 Osei-Adu Jonas, and Nsiah-Frimpong Benedicta. 2011. Willingness to adopt the vine  
547 multiplication technique in seed yam production in the forest savanna transition agro-  
548 ecological zone, Ghana. *Journal of Development and Agricultural Economics*. 3 Available at:  
549 [http://www.academicjournals.org/JDAE/abstracts/abstracts/abstracts2011/Dec/26%20Dec/As](http://www.academicjournals.org/JDAE/abstracts/abstracts/abstracts2011/Dec/26%20Dec/Asante%20et%20al.htm)  
550 [ante%20et%20al.htm](http://www.academicjournals.org/JDAE/abstracts/abstracts/abstracts2011/Dec/26%20Dec/Asante%20et%20al.htm) [Accessed December 9, 2013].



- 551 7. Austin, M. 2007. Species distribution models and ecological theory: A critical assessment  
552 and some possible new approaches. *Ecological Modelling*. 200:1–19.
- 553 8. Bentley, J. W., and Vasques, D. 1998. The seed potato system in Bolivia: organisational  
554 growth and missing links. *Agricultural Research and Extension Network*. :1–12.
- 555 9. Bertschinger, L., Bühler, L., Dupuis, B., Duffy, B., Gessler, C., Forbes, G. A., et al. 2017.  
556 Incomplete Infection of Secondarily Infected Potato Plants—an Environment Dependent  
557 Underestimated Mechanism in Plant Virology. *Frontiers in Plant Science*. 8:74.
- 558 10. Breidert, C., Hahsler, M., and Reutterer, T. 2006. A review of methods for measuring  
559 willingness-to-pay. *Innovative Marketing*. 2:8–32.
- 560 11. Buddenhagen, C. E., Hernandez Nopsa, J. F., Andersen, K. F., Andrade-Piedra, J., Forbes, G.  
561 A., Kromann, P., et al. 2017. Epidemic Network Analysis for Mitigation of Invasive  
562 Pathogens in Seed Systems: Potato in Ecuador. *Phytopathology*. 107:1209–1218.
- 563 12. van Bussel, L. G. J., Grassini, P., Van Wart, J., Wolf, J., Claessens, L., Yang, H., et al.  
564 2015a. From field to atlas: Upscaling of location-specific yield gap estimates. *Field Crops*  
565 *Research*. 177:98–108.
- 566 13. van Bussel, L. G. J., Grassini, P., Van Wart, J., Wolf, J., Claessens, L., Yang, H., et al.  
567 2015b. From field to atlas: Upscaling of location-specific yield gap estimates. *Field Crops*  
568 *Research*. 177:98–108.
- 569 14. Caley, P., and Kuhnert, P. M. 2006. Application and evaluation of classification trees for  
570 screening unwanted plants. *Austral Ecology*. 31:647–655.
- 571 15. Canessa, S., Guillera-Arroita, G., Lahoz-Monfort, J. J., Southwell, D. M., Armstrong, D. P.,  
572 Chadès, I., et al. 2015. When do we need more data? A primer on calculating the value of  
573 information for applied ecologists ed. Olivier Gimenez. *Methods in Ecology and Evolution*.  
574 6:1219–1228.
- 575 16. Choudhury, R. A., Garrett, K. A., Klosterman, S. J., Subbarao, K. V., and McRoberts, N.  
576 2017. A Framework for Optimizing Phytosanitary Thresholds in Seed Systems.  
577 *Phytopathology*. 107:1219–1228.
- 578 17. Condori, B., Hijmans, R. J., Ledent, J. F., and Quiroz, R. 2014. Managing Potato  
579 Biodiversity to Cope with Frost Risk in the High Andes: A Modeling Perspective ed. Ji-Hong  
580 Liu. *PLoS ONE*. 9:e81510.
- 581 18. Danthine, J.-P. 1978. Information, futures prices, and stabilizing speculation. *Journal of*  
582 *Economic Theory*. 17:79–98.
- 583 19. Devaux, A., Kromann, P., and Ortiz, O. 2014. Potatoes for sustainable global food security.  
584 *Potato Research*. 57:185–199.
- 585 20. Devaux, A., Ordinola, M. E., Hibon, A., and Flores, F. A. 2010. *El sector papa en la región*  
586 *andina: Diagnóstico y elementos para una visión estratégica (Bolivia, Ecuador y Perú)*.  
587 International Potato Center.
- 588 21. Etter, A., McAlpine, C., Wilson, K., Phinn, S., and Possingham, H. 2006. Regional patterns  
589 of agricultural land use and deforestation in Colombia. *Agriculture, Ecosystems &*  
590 *Environment*. 114:369–386.
- 591 22. Garrett, K. A. 2018. Impact network analysis: evaluating the success of interventions. *PeerJ*  
592 *Preprints* 6:e27037v1.
- 593 23. Garrett, K. A., Alcalá-Briseño, R. I., Andersen, K. F., Buddenhagen, C. E., Choudhury, R.  
594 A., Fulton, J. C., Hernandez Nopsa, J. F., Poudel, R., and Xing, Y. 2018. Network analysis:  
595 A systems framework to address grand challenges in plant pathology. *Annual Review of*  
596 *Phytopathology* 56:559-580.

- 597 24. Geenen, P. L., and Van Der Gaag, L. C. 2005. Developing a Bayesian network for clinical  
598 diagnosis in veterinary medicine: from the individual to the herd. In *Proceedings of the Third*  
599 *Bayesian Modelling Applications Workshop*; Edinburgh, Citeseer.
- 600 25. Gildemacher, P. R., Demo, P., Barker, I., Kaguongo, W., Woldegiorgis, G., Wagoire, W. W.,  
601 et al. 2009. A description of seed potato systems in Kenya, Uganda and Ethiopia. *American*  
602 *Journal of Potato Research*. 86:373–382.
- 603 26. Gildemacher, P. R., Leeuwis, C., Demo, P., Borus, D., Schulte-Geldermann, E., Mundia, P.,  
604 et al. 2012. Positive selection in seed potato production in Kenya as a case of successful  
605 research-led innovation. *International Journal of Technology Management & Sustainable*  
606 *Development*. 11:67–92.
- 607 27. Gildemacher, P. R., Schulte-Geldermann, E., Borus, D., Demo, P., Kinyae, P., Mundia, P., et  
608 al. 2011. Seed Potato Quality Improvement through Positive Selection by Smallholder  
609 Farmers in Kenya. *Potato Research*. 54:253–266.
- 610 28. Grassini, P., van Bussel, L. G. J., Van Wart, J., Wolf, J., Claessens, L., Yang, H., et al. 2015.  
611 How good is good enough? Data requirements for reliable crop yield simulations and yield-  
612 gap analysis. *Field Crops Research*. 177:49–63.
- 613 29. Hanemann, W. M. 1991. Willingness to pay and willingness to accept: how much can they  
614 differ? *The American Economic Review*. 81:635–647.
- 615 30. HarvestChoice. 2014. *Crop Production: SPAM*. Washington, DC and St. Paul, MN:  
616 International Food Policy Research Institute & University of Minnesota. Available at:  
617 <http://harvestchoice.org/node/9716>.
- 618 31. Hijmans, R. J., and Graham, C. H. 2006. The ability of climate envelope models to predict  
619 the effect of climate change on species distributions. *Global Change Biology*. 12:2272–2281.
- 620 32. Hirshleifer, J., and Riley, J. G. 1979. The Analytics of Uncertainty and Information-An  
621 Expository Survey. *Journal of Economic Literature*. 17:1375–1421.
- 622 33. Iritani, W. M. 1968. Factors affecting physiological aging (degeneration) of potato tubers  
623 used as seed. *American Journal of Potato Research*. 45:111–116.
- 624 34. van Ittersum, M. K., van Bussel, L. G. J., Wolf, J., Grassini, P., van Wart, J., Guilpart, N., et  
625 al. 2016. Can sub-Saharan Africa feed itself? *Proceedings of the National Academy of*  
626 *Sciences*. 113:14964–14969.
- 627 35. Jaffee, S., and Srivastava, J. 1994. The roles of the private and public sectors in enhancing  
628 the performance of seed systems. *The World Bank Research Observer*. 9:97–117.
- 629 36. Johnson, F. A., Smith, B. J., Bonneau, M., Martin, J., Romagosa, C., Mazzotti, F., et al. 2017.  
630 Expert Elicitation, Uncertainty, and the Value of Information in Controlling Invasive  
631 Species. *Ecological Economics*. 137:83–90.
- 632 37. Kawakami, K. 1962. The physiological degeneration of potato seed tubers and its control.  
633 *Potato Research*. 5:40–49.
- 634 38. Kristensen, K., and Rasmussen, I. A. 1997. The use of a Bayesian network to construct a  
635 decision support system for mechanical weed control in malting barley. In *Computer*  
636 *Modelling in Weed Science*, ed. J E Jensen. , p. 30–32.
- 637 39. Kromann, P., Andrade-Piedra, J. L., Navarrete, I., Taipe, A., and Gómez, J. 2017. Dataset  
638 for: Potato seed degeneration in Ecuador. International Potato Center Dataverse, V2.  
639 Available at: <http://dx.doi.org/10.21223/P3/3CT90C> [Accessed December 1, 2017].
- 640 40. Kromann, P., Montesdeoca, F., and Jorge Andrade-Piedra. 2016. Integrating formal and  
641 informal potato seed systems in Ecuador. In *Case Studies of Roots, Tubers and Bananas Seed*  
642 *Systems.*, eds. J. L. Andrade-Piedra, J. W. Bentley, C. Almekinders, K. Jacobsen, S. Walsh,

- 643 and G. Thiele. Lima, Peru: CGIAR Research Program on Roots, Tubers and Bananas (RTB),  
644 p. 14–32.
- 645 41. Kromann, P., Taïpe, A., Perez, W. G., and Forbes, G. A. 2009. Rainfall thresholds as support  
646 for timing fungicide applications in the control of potato late blight in Ecuador and Peru.  
647 *Plant Disease*. 93:142–148.
- 648 42. Langemeier, C. B., Robertson, A. E., Wang, D., Jackson-Ziems, T. A., and Kruger, G. R.  
649 2016. Factors Affecting the Development and Severity of Goss’s Bacterial Wilt and Leaf  
650 Blight of Corn, Caused by *Clavibacter michiganensis* subsp. *nebraskensis*. *Plant Disease*.  
651 101:54–61.
- 652 43. Lave, L. B. 1963. The Value of Better Weather Information to the Raisin Industry.  
653 *Econometrica*. 31:151–164.
- 654 44. Lobell, D. B., Cassman, K. G., and Field, C. B. 2009. Crop Yield Gaps: Their Importance,  
655 Magnitudes, and Causes. *Annual Review of Environment and Resources*. 34:179–204.
- 656 45. Lobell, D. B., Thau, D., Seifert, C., Engle, E., and Little, B. 2015. A scalable satellite-based  
657 crop yield mapper. *Remote Sensing of Environment*. 164:324–333.
- 658 46. Louwaars, N. P., de Boef, W. S., and Edeme, J. 2013. Integrated Seed Sector Development in  
659 Africa: A Basis for Seed Policy and Law. *Journal of Crop Improvement*. 27:186–214.
- 660 47. Macauley, M. K. 2006. The value of information: Measuring the contribution of space-  
661 derived earth science data to resource management. *Space Policy*. 22:274–282.
- 662 48. McGuire, S., and Sperling, L. 2013. Making seed systems more resilient to stress. *Global*  
663 *Environmental Change*. 23:644–653.
- 664 49. McGuire, S., and Sperling, L. 2016. Seed systems smallholder farmers use. *Food Security*.  
665 8:179–195.
- 666 50. McQuaid, C. F., Sseruwagi, P., Pariyo, A., and van den Bosch, F. 2016. Cassava brown  
667 streak disease and the sustainability of a clean seed system. *Plant Pathology*. 65:299–309.
- 668 51. Monfreda, C., Ramankutty, N., and Foley, J. A. 2008. Farming the planet: 2. Geographic  
669 distribution of crop areas, yields, physiological types, and net primary production in the year  
670 2000. *Global Biogeochemical Cycles*. 22:n/a-n/a.
- 671 52. Nagarajan, R., Scutari, M., and Lèbre, S. 2013. *Bayesian networks in R*.
- 672 53. Navarrete, I., Panchi, N., Kromann, P., Forbes, G., and Andrade-Piedra, J. 2017. Health  
673 quality of seed potato and yield losses in Ecuador. *bioRxiv*. :108712.
- 674 54. Novak, M. P., and LaDue, E. 1999. Application of Recursive Partitioning to Agricultural  
675 Credit Scoring. *Journal of Agricultural and Applied Economics*. 31:109–122.
- 676 55. Paul, P. A., and Munkvold, G. P. 2004. A model-based approach to preplanting risk  
677 assessment for gray leaf spot of maize. *Phytopathology*. 94:1350–1357.
- 678 56. Perez-Ariza, C. B., Nicholson, A. E., and Flores, M. J. 2012. Prediction of coffee rust disease  
679 using bayesian networks. In *Proceedings of the Sixth European Workshop on Probabilistic*  
680 *Graphical Models*, , p. 259–266.
- 681 57. Schulthess, U., Timsina, J., Herrera, J. M., and McDonald, A. 2013. Mapping field-scale  
682 yield gaps for maize: An example from Bangladesh. *Field Crops Research*. 143:151–156.
- 683 58. Sharma, K. K., and Kang, G. S. 2003. Appraisal of rate of degeneration in some potato  
684 cultivars. *Potato Journal*. 30:123–124.
- 685 59. Silva, J. V., Reidsma, P., Laborte, A. G., and van Ittersum, M. K. 2017. Explaining rice  
686 yields and yield gaps in Central Luzon, Philippines: An application of stochastic frontier  
687 analysis and crop modelling. *European Journal of Agronomy*. 82:223–241.

- 688 60. Sparks, A. H., Forbes, G. A., Hijmans, R. J., and Garrett, K. A. 2014. Climate change may  
689 have limited effect on global risk of potato late blight. *Global Change Biology*. 20:3621–  
690 3631.
- 691 61. Sperling, L. 2008. *When Disaster Strikes: a guide to assessing seed system security*. CIAT.
- 692 62. Sperling, L., Ortiz, O., and Thiele, G. 2013. *Seed systems. Conceptual frameworks for*  
693 *guiding practical interventions*. ed. CGIAR. CGIAR.
- 694 63. Sutherst, R. 1985. A computerised system for matching climates in ecology. *Agriculture,*  
695 *Ecosystems & Environment*. 13:281–299.
- 696 64. Therneau, T. M., Atkinson, B., and Ripley, B. 2010. rpart: Recursive partitioning. R package  
697 version. 3:1–46.
- 698 65. Thomas-Sharma, S., Abdurahman, A., Ali, S., Andrade-Piedra, J. L., Bao, S., Charkowski, A.  
699 O., et al. 2016. Seed degeneration in potato: the need for an integrated seed health strategy to  
700 mitigate the problem in developing countries. *Plant Pathology*. 65:3–16.
- 701 66. Thomas-Sharma, S., Andrade-Piedra, J., Carvajal Yepes, M., Hernandez Nopsa, J., Jeger, M.  
702 J., Jones, R., et al. 2017. A risk assessment framework for seed degeneration: Informing an  
703 integrated seed health strategy for vegetatively-propagated crops. *Phytopathology*. 107:1123–  
704 1135.
- 705 67. Tittonell, P., and Giller, K. E. 2013. When yield gaps are poverty traps: The paradigm of  
706 ecological intensification in African smallholder agriculture. *Field Crops Research*. 143:76–  
707 90.
- 708 68. van Wart, J., van Bussel, L. G. J., Wolf, J., Licker, R., Grassini, P., Nelson, A., et al. 2013.  
709 Use of agro-climatic zones to upscale simulated crop yield potential. *Field Crops Research*.  
710 143:44–55.
- 711 69. Wilson, E. C. F. 2015. A Practical Guide to Value of Information Analysis.  
712 *PharmacoEconomics*. 33:105–121.
- 713 70. Xing, Y. et al., 2017. Global cropland connectivity: A risk factor for invasion and saturation  
714 by emerging pathogens and pests. bioRxiv: <https://doi.org/10.1101/106542>.
- 715 71. You, L., Crespo, S., Guo, Z., Koo, J., Ojo, W., Sebastian, K., et al. 2012. MapSpaM - Home  
716 of the Spatial Production Allocation Model. Available at: <http://mapspam.info/> [Accessed  
717 December 15, 2017].
- 718 72. You, L., Wood, S., Wood-Sichra, U., and Wu, W. 2014. Generating global crop distribution  
719 maps: From census to grid. *Agricultural Systems*. 127:53–60.
- 720
- 721

722 Table 1. Regional adoption rates after positive selection training in Kenya and the expected  
723 realized benefit of training given the adoption rate. The average benefit is that expected under  
724 random allocation of training effort to the regions without regard to adoption rates.

| Region          | Observed adoption rate | Per household benefit \$USD | Expected realized benefit of training in year 1 |
|-----------------|------------------------|-----------------------------|-------------------------------------------------|
| Nakura          | 0.46                   | 156                         | 72                                              |
| Nyadarua        | 0.19                   | 156                         | 30                                              |
| Narok           | 0.18                   | 156                         | 28                                              |
| Average Benefit |                        |                             | 44                                              |

725

726



727 Table 2. Potential criteria for identifying priority sites for interventions (such as training farmers  
728 to use positive selection for improved seed health).  
729

| <b>Criterion</b>                                                 | <b>Rationale</b>                                         |
|------------------------------------------------------------------|----------------------------------------------------------|
| Regions where expected absolute benefit is greatest              | Greatest benefit to regional food production             |
| Regions where expected proportional gain is greatest             | Greatest benefit to regional farmers                     |
| Regions where outcomes before intervention are lowest            | Benefit to regions in greatest need                      |
| Regions where outcomes before intervention are highest           | Benefit to regions currently best adapted for production |
| <i>Incorporating measures of uncertainty at the farm level</i>   |                                                          |
| Regions where the 5 <sup>th</sup> percentile benefit is greatest | Consistent benefit across farmers                        |
| Regions where the trimmed mean is greatest                       | Greatest benefit for typical farmers                     |

730  
731

732

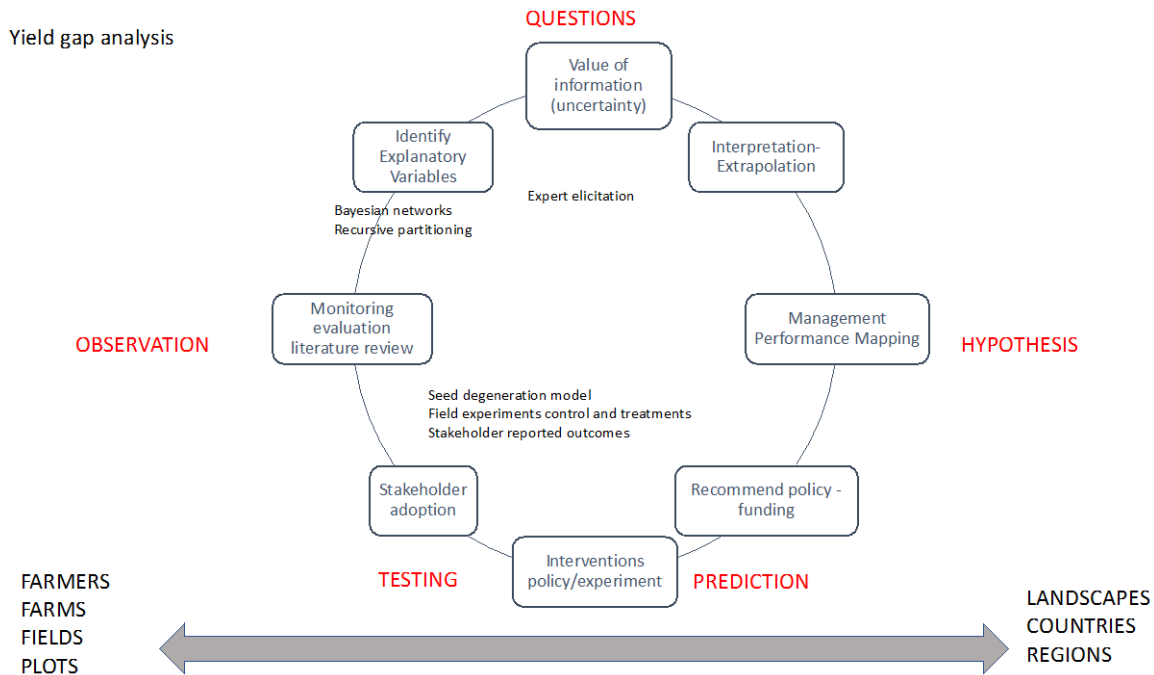

733

734

735

736

737

738

739

740

Fig 1. Development efforts ideally take place in a culture of continuous improvement, based on continuous monitoring and evaluation, and incorporating experimentation to facilitate adaptive management. The cycle described here closely resembles the learning cycle and the scientific process, in general. Management performance mapping operates in this context by scaling up field, farm, and plot derived information to larger scale landscapes, regions or countries.

741  
742

| <b>Management performance mapping</b>                                                 | <b>Example of the study of potato yield in Ecuador</b>                        |
|---------------------------------------------------------------------------------------|-------------------------------------------------------------------------------|
| (i) Assemble data related to management performance and potential predictor variables | Evaluation of how positive selection by farmers for better seed affects yield |
| (ii) Identify predictor variables for the performance measures                        | Bayesian networks and rcart used for identification                           |
| (iii) Evaluate management impacts of the different interventions                      | Positive selection compared to random selection                               |
| (iv) Identify highest-performing management intervention or policy                    | Elevation combined with other factors                                         |
| (v) Assess the value of information                                                   | Evaluation of how informed decision-making increases yield                    |
| (vi) Link predictor variables to GIS data layers                                      | Results mapped to potato regions of Ecuador                                   |
| (vii) Implement interventions                                                         |                                                                               |
| (viii) Facilitate and assess technology adoption by farmers                           |                                                                               |

743  
744  
745  
746  
747  
748

Figure 2. The steps in a management performance mapping “pipeline”, illustrated for the use of positive selection for seed potato in Ecuador.

749  
750

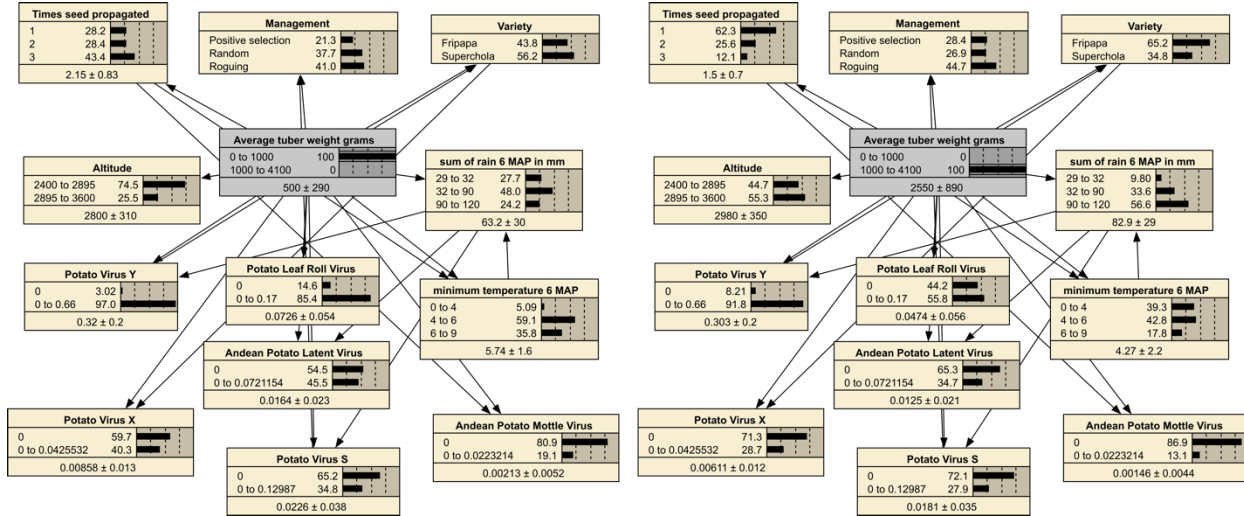

751  
752  
753  
754  
755  
756  
757  
758

Figure 3. Ecuadorian potato yield and the factors associated with yield from a Bayesian network analysis in Netica, where the impact of selected conditions can be seen for plants with low yield (left) and high yield (right) and the posterior probabilities in other nodes is returned. The lower text for each node gives the estimated mean and uncertainty.

759  
760

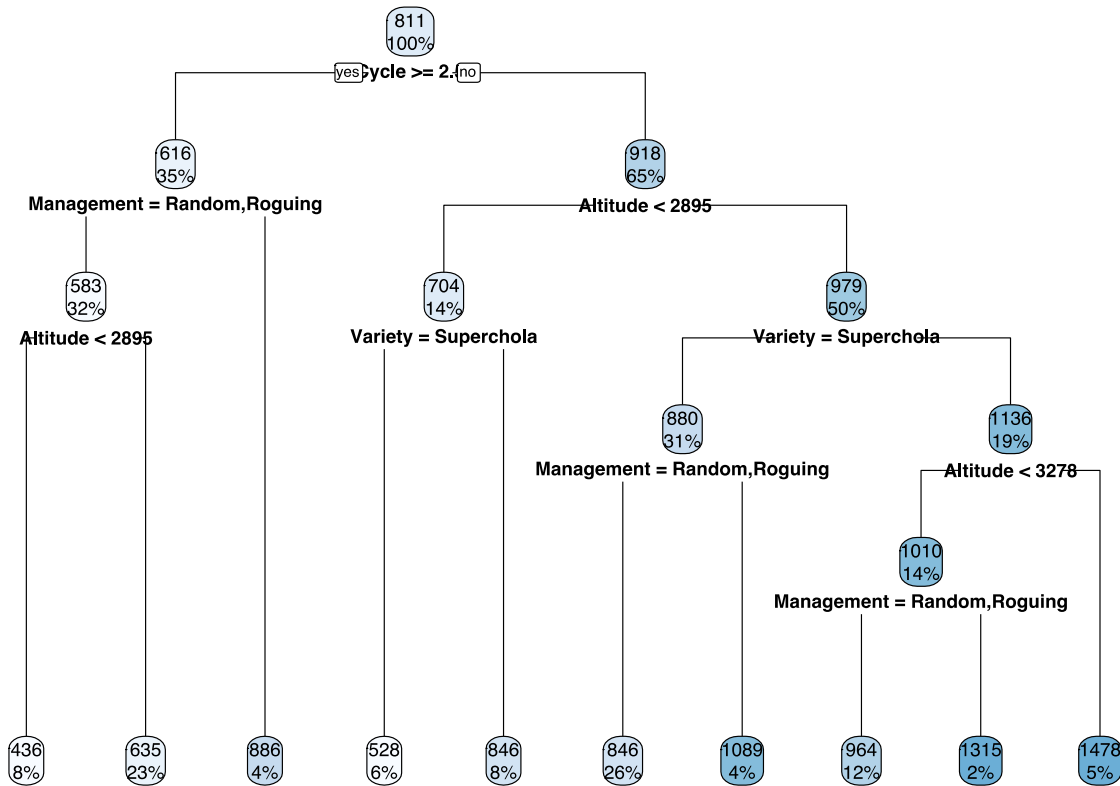

761  
762 Fig. 4. Recursive partitioning results in decision tree format, with per plant yield (g) as the  
763 dependent variable. Branches to the left are results when the logical statements at the nodes are  
764 true, and branches to the right are results when the logical statements are false. The upper  
765 numbers in the boxes are the mean yields for that condition, and the percent values are the  
766 proportion of the data for which the condition applies.

767  
768



769  
770  
771

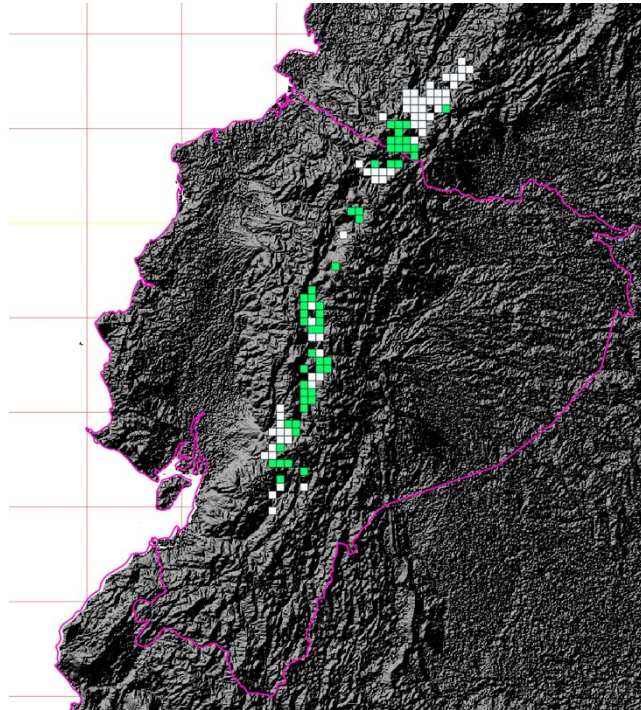

772  
773 Figure 5A. Ecuador and surroundings, with potato production indicated based on MapSpam  
774 estimates. Pixels above and below 2895 m.a.s.l. are indicated in green and white, where pixels  
775 are included if the harvested area estimate is greater than 200 ha. We find that 51% of the  
776 harvested is above this threshold. The country border is for Ecuador, and the graticules are 1  
777 degree squares.

778  
779

780  
781

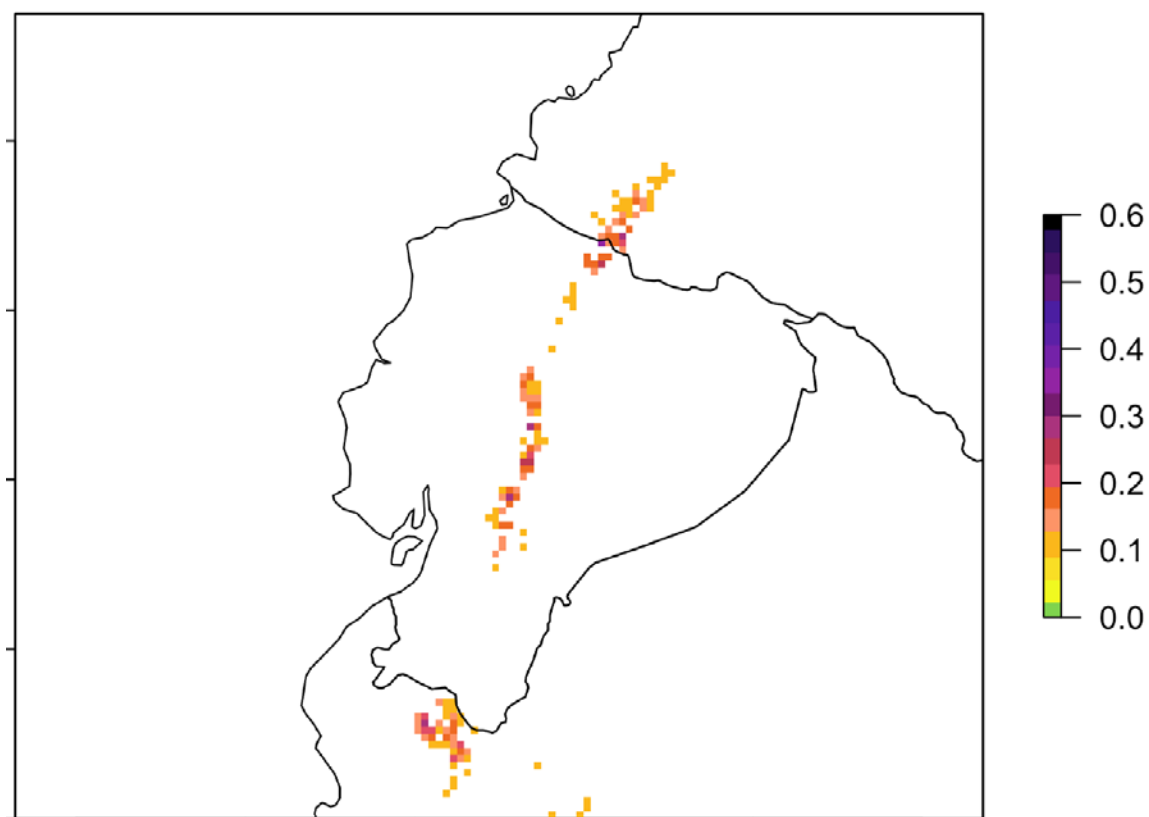

782  
783  
784  
785  
786  
787  
788

Figure 5B. The potato cropland connectivity risk index estimated for Ecuador and southern Colombia, based on the mean from uncertainty quantification across multiple parameter combinations (Xing et al., 2017).
